# Supplementary material for: Microbial Community Composition and Activity in Saline Soils of Coastal Agro–Ecosystems
Source: MDPI journal article supplement (doi:10.3390/microorganisms10040835), 2022-04-18
Supplement: s1 [file s1]

**Table S1.** Topological properties of the observed molecular ecological networks (MENs) and their associated random MENs

|                                               | Non-salinity     |                 | Mild-salinity    |                 | Severe-salinity  |                 |
|-----------------------------------------------|------------------|-----------------|------------------|-----------------|------------------|-----------------|
| Network Indexes                               | Observed Network | Random Networks | Observed Network | Random Networks | Observed Network | Random Networks |
| Average clustering coefficient (avgCC)        | 0.248            | 0.047 +/- 0.002 | 0.207            | 0.055 +/- 0.003 | 0.339            | 0.064 +/- 0.002 |
| Average path distance (GD)                    | 5.303            | 2.882 +/- 0.010 | 6.094            | 3.091 +/- 0.014 | 3.852            | 2.421 +/- 0.005 |
| Geodesic efficiency (E)                       | 0.228            | 0.377 +/- 0.001 | 0.2              | 0.350 +/- 0.001 | 0.305            | 0.445 +/- 0.001 |
| Harmonic geodesic distance (HD)               | 4.389            | 2.653 +/- 0.007 | 5.002            | 2.856 +/- 0.009 | 3.284            | 2.247 +/- 0.003 |
| Centralization of degree (CD)                 | 0.06             | 0.060 +/- 0.000 | 0.058            | 0.058 +/- 0.000 | 0.087            | 0.087 +/- 0.000 |
| Centralization of betweenness (CB)            | 0.047            | 0.015 +/- 0.002 | 0.118            | 0.020 +/- 0.002 | 0.052            | 0.010 +/- 0.001 |
| Centralization of stress centrality (CS)      | 517.933          | 0.163 +/- 0.012 | 648.053          | 0.198 +/- 0.019 | 115.604          | 0.163 +/- 0.011 |
| Centralization of eigenvector centrality (CE) | 0.177            | 0.094 +/- 0.004 | 0.161            | 0.103 +/- 0.007 | 0.109            | 0.061 +/- 0.002 |
| Density (D)                                   | 0.019            | 0.019 +/- 0.000 | 0.014            | 0.014 +/- 0.000 | 0.035            | 0.035 +/- 0.000 |
| Reciprocity                                   | 1                | 1.000 +/- 0.000 | 1                | 1.000 +/- 0.000 | 1                | 1.000 +/- 0.000 |
| Transitivity (Trans)                          | 0.228            | 0.059 +/- 0.001 | 0.245            | 0.077 +/- 0.001 | 0.297            | 0.069 +/- 0.001 |
| Connectedness (Con)                           | 0.862            | 0.982 +/- 0.008 | 0.908            | 0.988 +/- 0.007 | 0.965            | 0.995 +/- 0.004 |
| Efficiency                                    | 0.979            | 0.982 +/- 0.000 | 0.986            | 0.987 +/- 0.000 | 0.965            | 0.966 +/- 0.000 |
| Hierarchy                                     | 0                | 0.000 +/- 0.000 | 0                | 0.000 +/- 0.000 | 0                | 0.000 +/- 0.000 |
| Lubness                                       | 1                | 1.000 +/- 0.000 | 1                | 1.000 +/- 0.000 | 1                | 1.000 +/- 0.000 |
| Modularity(fast_greedy)                       | 0.775            | 0.189 +/- 0.003 | 0.74             | 0.221 +/- 0.003 | 0.677            | 0.125 +/- 0.003 |

**Table S2.** Pair-wise comparison of network parameters among salinity levels

|                                                      | Mild<br>Non | vs | Severe<br>Non | vs | Severe<br>Mild | vs |
|------------------------------------------------------|-------------|----|---------------|----|----------------|----|
| <b>Average clustering coefficient (avgCC)</b>        | 0.0001      |    | 0.0001        |    | 0.0001         |    |
| <b>Average path distance (GD)</b>                    | 0.0001      |    | 0.0001        |    | 0.0001         |    |
| <b>Geodesic efficiency (E)</b>                       | 0.0001      |    | 0.0001        |    | 0.0001         |    |
| <b>Harmonic geodesic distance (HD)</b>               | 0.0001      |    | 0.0001        |    | 0.0001         |    |
| <b>Centralization of degree (CD)</b>                 | \           |    | \             |    | \              |    |
| <b>Centralization of betweenness (CB)</b>            | 0.0001      |    | 0.0001        |    | 0.0001         |    |
| <b>Centralization of stress centrality (CS)</b>      | 0.0001      |    | 0.0001        |    | 0.0001         |    |
| <b>Centralization of eigenvector centrality (CE)</b> | 0.0001      |    | 0.0001        |    | 0.0001         |    |
| <b>Density (D)</b>                                   | \           |    | \             |    | \              |    |
| <b>Reciprocity</b>                                   | \           |    | \             |    | \              |    |
| <b>Transitivity (Trans)</b>                          | 0.0001      |    | 0.0001        |    | 0.0001         |    |
| <b>Connectedness (Con)</b>                           | 0.0001      |    | 0.0001        |    | 0.0001         |    |
| <b>Efficiency</b>                                    | \           |    | \             |    | \              |    |
| <b>Hierarchy</b>                                     | \           |    | \             |    | \              |    |
| <b>Lubness</b>                                       | \           |    | \             |    | \              |    |
| <b>Modularity(fast_greedy)</b>                       | 0.0001      |    | 0.0001        |    | 0.0001         |    |

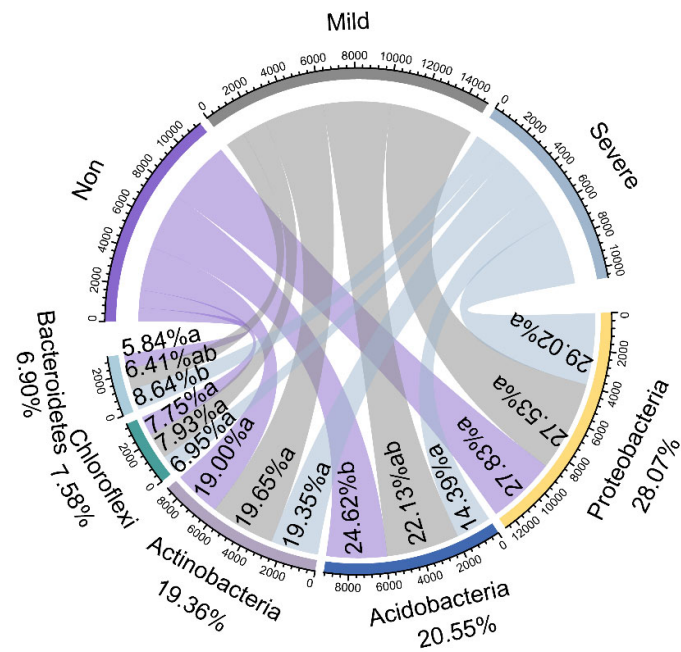

**Figure S1.** Phylogenetic distributions of dominant bacterial phyla in soils with three salinity levels, Non-salinity, Mild-salinity and Severe-salinity. Different letters denote significant phylogenetic differences ( $p < 0.05$ ) among salinity levels.

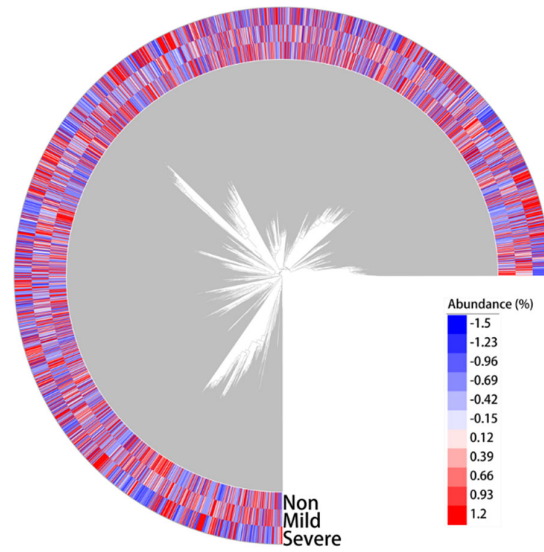

**Figure S2.** Phylogenetic distribution of the 3123 bacteria and their relative abundance among three salinity soils.
